# Supplementary material
Source: PubMed Central journal article supplement (PMC3474436)
Supplement: 12_091_Leth-Larsen.Suppl.pdf [file 12_091_Leth-Larsen.Suppl.pdf]

# Functional Heterogeneity within the CD44 High Human Breast Cancer Stem Cell-Like Compartment Reveals a Gene Signature Predictive of Distant Metastasis

Rikke Leth-Larsen,<sup>1</sup> Mikkel G Terp,<sup>1</sup> Anne G Christensen,<sup>1</sup> Daniel Elias,<sup>1</sup> Thorsten Kühlwein,<sup>1</sup> Ole N Jensen,<sup>2</sup> Ole W Petersen,<sup>3</sup> and Henrik J Ditzel<sup>1,4</sup>

Online address: <http://www.molmed.org>

The Feinstein Institute  
for Medical Research 

## RELATED TO FIGURE 1, SUPPLEMENTARY FIGURES S1–S3 AND SUPPLEMENTARY TABLE S1:

### Characterization of Single Cell Clones, A4 and G4

The isogenic background of CD44<sup>hi</sup>/CD24<sup>+</sup> G4 and CD44<sup>hi</sup>/CD24<sup>lo</sup> A4 was shown by G-band karyotyping relative to the parental cell line and revealed identical genetic abnormalities (1) (Supplementary Figure S1). Moreover, the phenotypic stability of the CD44<sup>hi</sup>/CD24<sup>+</sup> G4 and CD44<sup>hi</sup>/CD24<sup>lo</sup> A4 clones over time, as determined by CD44 and CD24 expression, was analyzed under normal adherent growth conditions. In the presence of growth factors (EGF and FGF) the morphology, CD44 and CD24 expression of the CD44<sup>hi</sup>/CD24<sup>+</sup> G4 clones remained unchanged during 3 wks of passages (14 cell doublings). In contrast, in the absence of growth factors, the CD44<sup>hi</sup>/CD24<sup>+</sup> G4 clone grew more slowly and increased CD24 expression to the level of the CD44<sup>hi</sup>/CD24<sup>lo</sup> A4 clone and the parental cell line, although the morphology remained mesenchymal-like. CD44 levels remained unchanged. For the CD44<sup>hi</sup>/CD24<sup>lo</sup> A4 clone, CD44 and CD24 expression remained unchanged in both the presence and absence of growth factors (Supplementary Figure S2).

A4 and G4 are designated Basal A and Basal B phenotypes according to their

transcription profiles, morphology and invasion features, which highly resemble those previously described for Basal A and Basal B cell lines and primary tumors (2-4). A4 is designated Basal A due to the luminal-like morphology and its expression of genes distinct from Basal B (3) including *DDR1*, *SHANK2*, *RBM47*, *F11R*, *ATAD4*, *ESRP1*, *SLC9*, *ERBB3*, *CRABP2*, *SPINT2*, *EFHD1*, *MYO5C*, *SPINT1*, *ANK3*, *DLG3*, *RAB25*, *EPCAM*, *CLDN4*, *PRSS8*, *ELF3*, *CD24*, *GRHL2*. G4 is designated Basal B, due to the mesenchymal-like appearance and higher invasive potential in Boyden chambers (24-well QCM™ Endothelial Cell Invasion Assay; EMD Millipore, Billerica, MA, USA) relative to A4 (Supplementary Figure S3). Further, G4 exhibits higher expression of *ZEB1*, *EMP3*, *FBN1*, *TGFBI*, *VIM* and *SPARC* relative to A4. These genes distinguish the Basal B group from cells with other features (3).

## RELATED TO FIGURE 5, SUPPLEMENTARY FIGURE S4 AND SUPPLEMENTARY TABLE S2:

### Gene Array Profiling of the CD44<sup>hi</sup>/CD24<sup>lo</sup> Subsets Revealed Novel Markers and Pathways Linked to Tumor-Initiating Cells as well as a Prognostic Gene Signature

The outcome of gene array analysis of G4 and A4 showed a total of 3660 differentially expressed genes (FDR 0.01, p<

0.01). A panel of 599 mRNAs was expressed differentially more than two-fold between G4 and A4 (Supplementary Table S2). Ingenuity pathway analysis revealed several networks, including a network of 59 genes that were up-regulated more than three-fold in A4 compared to G4, including genes known to be involved in cancer, reproductive systems and genetic disease (Supplementary Figure S4).

## SUPPLEMENTAL REFERENCES

1. Brothman AR, Persons DL, Shaffer LG (2009) Nomenclature evolution: Changes in the ISCN from the 2005 to the 2009 edition. *Cytogenet Genome Res* 127: 1-4.
2. Neve RM, et al. (2006) A collection of breast cancer cell lines for the study of functionally distinct cancer subtypes. *Cancer Cell* 10: 515-527.
3. Blick T, et al. (2010) Epithelial mesenchymal transition traits in human breast cancer cell lines parallel the CD44(hi)/CD24(lo/-) stem cell phenotype in human breast cancer. *J Mammary Gland Biol Neoplasia* 15: 235-252.
4. Shipitsin M, et al. (2007) Molecular definition of breast tumor heterogeneity. *Cancer Cell* 11: 259-273.

**HMT3909S13:**

43-57,XX,+1,add(1)(p36),dup(1)(q25q44),add(3)(q29),+5,+5,+6,add(9)(p13),add(9)(p24),  
add(11)(p15),del(11)(p11),-14,+16,add(16)(q24)x2,-21,-22,-22,+5-9mar[cp18]

**A4:**

50-58,XX,+1,add(1)(p36),dup(1)(q25q44),add(3)(q29),+5,+5,+6,add(9)(p13),add(9)(p24),  
add(11)(p15),del(11)(p11),-14,+16,add(16)(q24)x2,-21,-22,-22,+5-9mar[cp18]

**G4:**

48-54,XX,+1,add(1)(p36),dup(1)(q25q44),add(3)(q29),+5,+5,+6,add(9)(p13),add(9)(p24),  
add(11)(p15),del(11)(p11),-14,+16,add(16)(q24)x2,-21,-22,-22,+5-9mar[cp17]

**Supplementary Figure S1.** G-band karyotyping of HMT3909S13, A4 and G4 described in accordance with the International System for Human Cytogenetic Nomenclature (ISCN 2005).

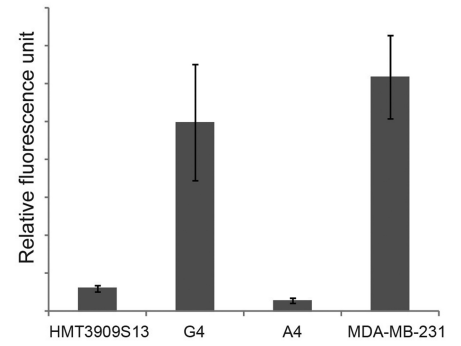

**Supplementary Figure S3.** Boyden chamber invasion assay. Cell invasion assay of HMT3909S13, G4, A4 and MDA-MB-231 was performed according to manufacturer's protocol in 72 h. The figure is representative of four experiments. Cells were grown in MEGM without B27.

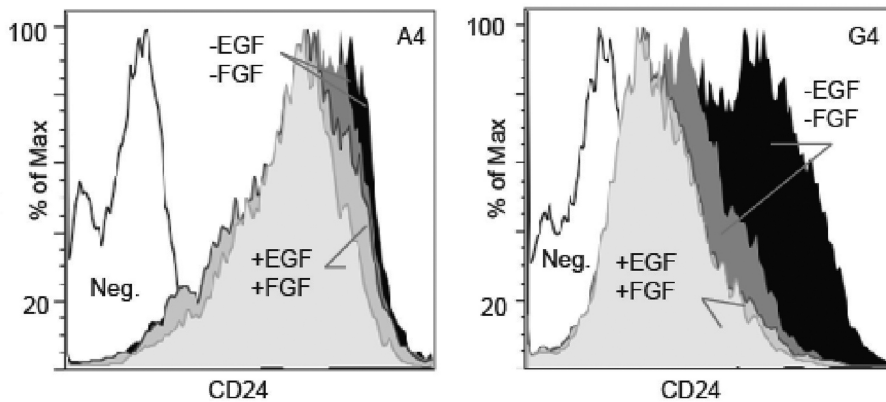

**Supplementary Figure S2.** Phenotypic stability of the CD44<sup>hi</sup>/CD24<sup>lo</sup> G4 and CD44<sup>hi</sup>/CD24<sup>lo</sup> A4 clones, as determined by CD24 expression using flow cytometry, were analyzed under normal adherent growth conditions. The chromatogram of the 1<sup>st</sup> and 14<sup>th</sup> doublings are depicted with and without growth factors (EGF and FGF).

**Supplementary Table S1.** Immunocytochemical staining of the CD44<sup>hi</sup>/CD24<sup>-</sup> G4 and CD44<sup>hi</sup>/CD24<sup>lo</sup> A4 clones and the parental cell line HMT3909S13.

|                    | CD44 <sup>hi</sup> /CD24 <sup>-</sup> G4 | CD44 <sup>hi</sup> /CD24 <sup>lo</sup> A4 | HMT3909S13 |
|--------------------|------------------------------------------|-------------------------------------------|------------|
| ER/PgR/HER2        | -                                        | -                                         | -          |
| CD24               | -                                        | +(10%)                                    | -          |
| Vimentin           | +++ (80%)                                | ++ (5%)                                   | +++ (100%) |
| E-Cadherin         | ++ (40%)                                 | +(80%)                                    | -          |
| CK 5/6             | ++ (50%)                                 | +++ (90%)                                 | ++ (70%)   |
| CK 7/8, 18, 19     | +++ (100%)                               | +++ (100%)                                | +++ (100%) |
| CK 14              | +(100%)                                  | +(100%)                                   | +(100%)    |
| CK17               | ++ (80%)                                 | +(80%)                                    | +(80%)     |
| CD29/ Integrin β1  | ++ (100%)                                | ++ (100%)                                 | ++ (100%)  |
| CD49f/ Integrin α6 | +(50%)                                   | +(50%)                                    | +(50%)     |
| ESA/EpCAM          | ++ (30%)                                 | ++ (100%)                                 | -          |
| HER1/EGFR          | ++ (70%)                                 | ++ (70%)                                  | +(70%)     |

The staining intensity and percentage of cells expressing protein are listed. The staining intensity is graded: -, +, ++ and +++.

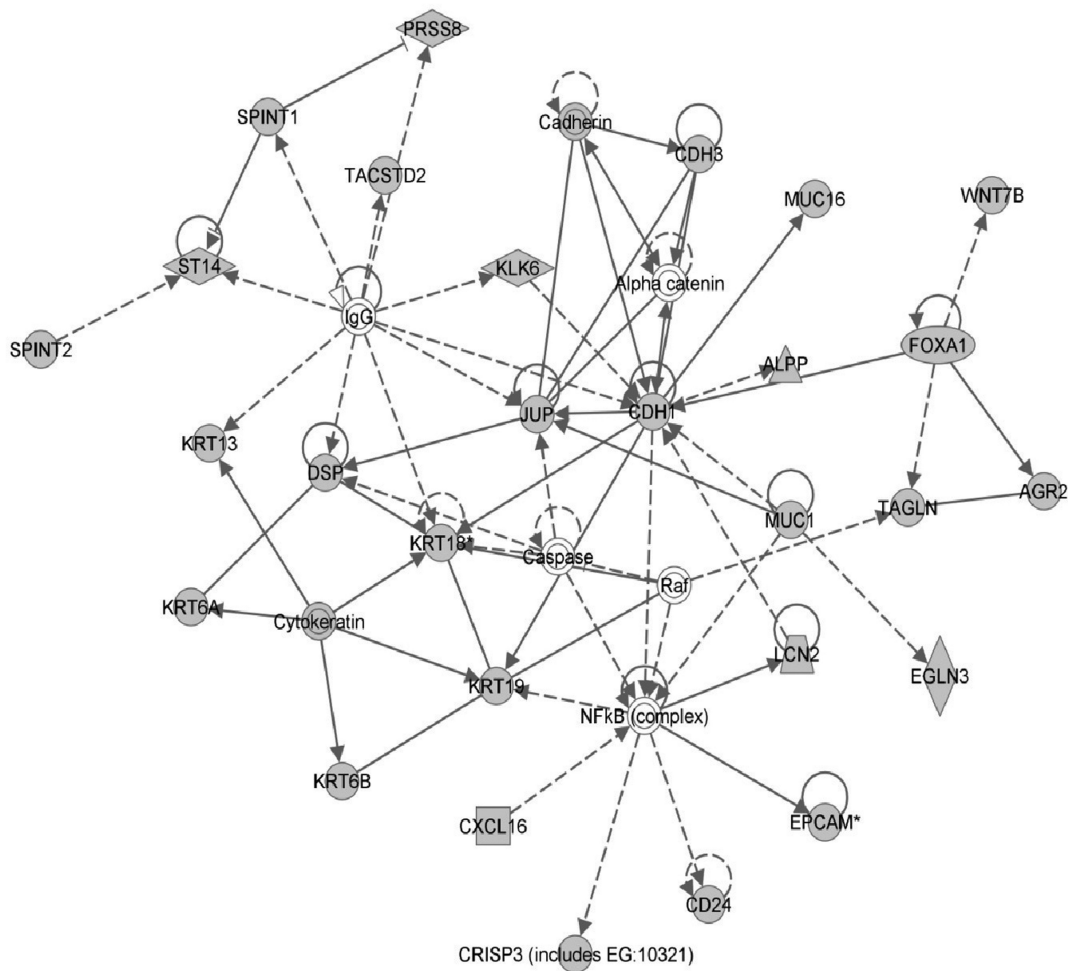

**Supplementary Figure S4.** Ingenuity Pathway analysis predicted a network of 59 genes that were upregulated more than three-fold in A4 compared to G4, including genes known to be involved in cancer, reproductive systems and genetic disease.

**FUNCTIONAL HETEROGENEITY OF CANCER STEM CELL-LIKE CELLS**

**Supplementary Table S2.** Microarray data of 599 mRNAs more than two-fold differently expressed in A4 relative to G4 (FDR 0.01).<sup>a,b</sup>

| Gene assignment                                                 | Gene Symbol | p-value  | Fold-Change (A4 vs G4) | Gene assignment                                         | Gene Symbol | p-value  | Fold-Change (A4 vs G4) |
|-----------------------------------------------------------------|-------------|----------|------------------------|---------------------------------------------------------|-------------|----------|------------------------|
| epithelial splicing regulatory protein 1                        | ESRP1       | 2.85E-12 | 71,72                  | serine peptidase inhibitor, Kunitz type 1               | SPINT1      | 7,03E-09 | 5,79                   |
| urothelial cancer associated 1 (non-protein coding)             | UCA1        | 6,73E-12 | 59,13                  | mucin 12, cell surface associated                       | MUC12       | 2,22E-05 | 5,76                   |
| plastin 3                                                       | PLS3        | 4,22E-15 | 54,51                  | ectonucleotide pyrophosphatase/phosphodiesterase 5      | ENPP5       | 2,28E-07 | 5,74                   |
| epithelial cell adhesion molecule                               | EPCAM       | 2,25E-10 | 48,08                  | ArfGAP with dual PH domains 1                           | ADAP1       | 1,64E-08 | 5,70                   |
| vestigial like 1                                                | VGLL1       | 2,34E-09 | 47,76                  | UDP-GlcNAc transferase                                  | B3GNT3      | 4,74E-08 | 5,68                   |
| cadherin 1, type 1, E-cadherin                                  | CDH1        | 1,37E-10 | 43,55                  | solute carrier family 6                                 | SLC6A11     | 4,50E-07 | 5,65                   |
| integrin, beta 6                                                | ITGB6       | 8,00E-09 | 32,75                  | protein kinase, cAMP-dependent, regulatory, type II     | PRKAR2B     | 1,29E-05 | 5,58                   |
| pancreatic lipase-related protein 3                             | PNLIPRP3    | 1,57E-11 | 32,72                  | sushi, von Willebrand factor type A                     | SVEP1       | 7,62E-06 | 5,42                   |
| myelin protein zero-like 2                                      | MPZL2       | 1,82E-07 | 26,89                  | F11 receptor                                            | F11R        | 2,82E-06 | 5,41                   |
| tandem C2 domains, nuclear                                      | TC2N        | 8,25E-11 | 25,00                  | interferon regulatory factor 6                          | IRF6        | 3,66E-08 | 5,36                   |
| grainyhead-like 2                                               | GRHL2       | 9,76E-11 | 24,61                  | transmembrane protein 63C                               | TMEM63C     | 2,32E-05 | 5,35                   |
| RAB25, member RAS oncogene family                               | RAB25       | 1,18E-10 | 24,31                  | microtubule-associated protein 7                        | MAP7        | 1,91E-09 | 5,32                   |
| kallikrein-related peptidase 6                                  | KLK6        | 2,95E-06 | 23,39                  | retinoic acid receptor responder                        | RARRR51     | 6,00E-05 | 5,30                   |
| anterior gradient homolog 2                                     | AGR2        | 7,38E-09 | 21,31                  | UDP-N-acetyl-alpha-D-galactosamine                      | GALNT3      | 7,26E-08 | 5,28                   |
| cadherin 3, type 1, P-cadherin                                  | CDH3        | 1,06E-07 | 18,37                  | myosin VC                                               | MYO5C       | 3,33E-05 | 5,20                   |
| G protein-coupled receptor 110                                  | GPR110      | 1,90E-07 | 18,31                  | solute carrier organic anion transporter family         | SLCO1B3     | 7,15E-07 | 5,14                   |
| aldo-keto reductase family 1, member B10                        | AKR1B10     | 5,72E-08 | 16,91                  | exophilin 5                                             | EXPH5       | 5,76E-10 | 5,14                   |
| claudin 7                                                       | CLDN7       | 7,06E-08 | 16,68                  | lipocalin 2                                             | LCN2        | 4,37E-07 | 5,12                   |
| solute carrier family 7                                         | SLC7A7      | 2,55E-10 | 16,20                  | interleukin 20 receptor                                 | IL20RA      | 2,62E-06 | 5,09                   |
| adaptor-related protein complex 1, mu 2 subunit                 | AP1M2       | 1,61E-10 | 15,91                  | epithelial splicing regulatory protein 2                | ESRP2       | 8,93E-07 | 4,91                   |
| coxsackie virus and adenovirus receptor                         | CXADR       | 4,80E-09 | 13,83                  | protocadherin 7                                         | PCDH7       | 2,92E-07 | 4,90                   |
| cysteine-rich secretory protein 3                               | CRISP3      | 6,14E-06 | 12,59                  | plasma membrane proteolipid (plasmolipin)               | PLLP        | 1,42E-05 | 4,87                   |
| peptidyl arginine deiminase, type IV                            | PADI4       | 4,69E-07 | 12,49                  | endoplasmic reticulum metalloproteinase 1               | ERMP1       | 1,40E-08 | 4,87                   |
| family with sequence similarity 83, member B                    | FAM83B      | 2,04E-07 | 11,49                  | ATP-binding cassette, sub-family A (ABC1), member 12    | ABCA12      | 1,67E-08 | 4,85                   |
| lipolysis stimulated lipoprotein receptor                       | LSR         | 2,77E-12 | 11,36                  | CDP-diacylglycerol synthase                             | CDS1        | 2,35E-07 | 4,83                   |
| GRAM domain containing 2                                        | GRAMD2      | 1,10E-08 | 11,17                  | membrane protein, palmitoylated 7                       | MPP7        | 4,07E-07 | 4,81                   |
| scieillin                                                       | SCEL        | 1,05E-07 | 10,40                  | cellular retinoic acid binding protein 2                | CRABP2      | 6,50E-06 | 4,75                   |
| ceruloplasmin                                                   | CP          | 1,62E-06 | 10,35                  | annexin A3                                              | ANXA3       | 4,34E-06 | 4,72                   |
| protease, serine, 8                                             | PRSS8       | 2,33E-09 | 10,21                  | carbonyl reductase 1                                    | CBR1        | 2,76E-07 | 4,72                   |
| s100 calcium binding protein A14                                | S100A14     | 1,34E-10 | 10,16                  | alkaline phosphatase, placental                         | ALPP        | 3,71E-06 | 4,67                   |
| mucin 16, cell surface associated                               | MUC16       | 1,81E-06 | 9,94                   | transmembrane protein 30B                               | TMEM30B     | 1,20E-08 | 4,63                   |
| serine peptidase inhibitor, Kunitz type, 2                      | SPINT2      | 1,91E-05 | 9,77                   | aldo-keto reductase family 1, member C2                 | AKR1C2      | 4,31E-04 | 4,62                   |
| suppression of tumorigenicity 14 (colon carcinoma)              | ST14        | 3,59E-09 | 9,42                   | gap junction protein, alpha 5                           | GJA5        | 4,08E-06 | 4,62                   |
| myosin VB                                                       | MYO5B       | 1,70E-09 | 9,36                   | lipase, member H                                        | LIPH        | 1,09E-05 | 4,59                   |
| histone cluster 1, H3i                                          | HIST1H3I    | 1,48E-05 | 9,00                   | kallikrein-related peptidase 10                         | KLK10       | 2,04E-06 | 4,56                   |
| fibroblast growth factor receptor 2                             | FGFR2       | 7,97E-08 | 8,62                   | ets homologous factor                                   | EHF         | 3,18E-08 | 4,48                   |
| transgelin                                                      | TAGLN       | 3,45E-06 | 8,52                   | v-erb-b2 erythroblastic leukemia viral oncogene         | ERBB3       | 1,35E-08 | 4,21                   |
| G protein-coupled receptor 56                                   | GPR56       | 6,93E-06 | 8,48                   | WW and C2 domain containing 1                           | WWC1        | 3,91E-08 | 4,20                   |
| chromosome 1 open reading frame 116                             | C1orf116    | 1,50E-08 | 8,43                   | chromosome 9 open reading frame 152                     | C9orf152    | 2,47E-08 | 4,20                   |
| dermokine                                                       | DMKN        | 1,57E-10 | 8,13                   | prostate stem cell antigen                              | PSCA        | 5,02E-07 | 4,17                   |
| metastasis associated in colon cancer 1                         | MACC1       | 2,61E-07 | 8,02                   | glutathione S-transferase mu 3                          | GSTM3       | 1,37E-05 | 4,16                   |
| mal, T-cell differentiation protein 2                           | MAL2        | 6,17E-07 | 7,64                   | unc-5 homolog C                                         | UNC5C       | 7,24E-06 | 4,16                   |
| phosphodiesterase 3B, cGMP-inhibited                            | PDE3B       | 6,36E-10 | 7,26                   | HRAS-like suppressor 2                                  | HRASLS2     | 7,93E-09 | 4,13                   |
| desmoplakin                                                     | DSP         | 2,50E-05 | 7,23                   | TRAF2 and NCK interacting kinase                        | TNIK        | 9,11E-10 | 4,07                   |
| keratin 13                                                      | KRT13       | 4,64E-08 | 7,19                   | chromosome 19 open reading frame 46                     | C19orf46    | 9,36E-07 | 4,02                   |
| gasdermin C                                                     | GSDMC       | 2,60E-06 | 7,17                   | dehydrogenase/reductase (SDR family) member 3           | DHRS3       | 1,08E-04 | 4,02                   |
| sema domain, seven thrombospondin repeats                       | SEMA5A      | 1,53E-08 | 7,16                   | sortilin-related receptor                               | SORL1       | 1,19E-07 | 4,01                   |
| E74-like factor 3 (ets domain transcription factor, epithelial) | ELF3        | 1,37E-07 | 6,90                   | fucosyltransferase 9 (alpha (1,3) fucosyltransferase)   | FUT9        | 2,12E-07 | 3,98                   |
| MARVEL domain containing 2                                      | MARVELD2    | 3,04E-08 | 6,88                   | kinesin family member 13B                               | KIF13B      | 4,37E-07 | 3,96                   |
| solute carrier family 7 (cationic amino acid transporter)       | SLC7A8      | 1,97E-05 | 6,86                   | chromosome 19 open reading frame 21                     | C19orf21    | 1,14E-06 | 3,94                   |
| nephronectin                                                    | NPNT        | 2,45E-07 | 6,75                   | ArfGAP with RhoGAP domain                               | ARAP2       | 8,13E-05 | 3,94                   |
| complement factor H                                             | CFH         | 9,83E-06 | 6,64                   | creatine kinase, mitochondrial 1A                       | CKMT1A      | 2,29E-07 | 3,93                   |
| ladinin 1                                                       | LAD1        | 8,27E-09 | 6,62                   | acyl-CoA synthetase family member 2                     | ACSF2       | 1,23E-05 | 3,88                   |
| hook homolog 1                                                  | HOOK1       | 4,10E-09 | 6,47                   | anoctamin 1, calcium activated chloride channel         | ANO1        | 3,00E-08 | 3,86                   |
| junction plakoglobin                                            | JUP         | 3,57E-09 | 6,32                   | tumor-associated calcium signal transducer 2            | TACSTD2     | 4,75E-07 | 3,84                   |
| FXYD domain containing ion transport regulator 3                | FXYD3       | 2,70E-07 | 6,28                   | carcinoembryonic antigen-related cell adhesion molecule | CEACAM1     | 1,22E-05 | 3,83                   |
| nucleoporin 210kDa                                              | NUP210      | 1,37E-06 | 6,25                   | mucin 12, cell surface associated                       | MUC12       | 1,15E-04 | 3,83                   |
| ELOVL family member 7                                           | ELOVL7      | 2,52E-08 | 6,22                   | chromosome 11 open reading frame 70                     | C11orf70    | 2,02E-08 | 3,83                   |
| occludin                                                        | OCLN        | 2,87E-07 | 6,06                   | wingless-type MMTV integration site family, member 7B   | WN7B        | 3,87E-07 | 3,80                   |
| calcium channel, voltage-dependent, gamma subunit 4             | CACNG4      | 7,83E-08 | 5,99                   | organic anion transporter LST-3b                        | LST-3TM12   | 2,05E-07 | 3,74                   |
| prominin 2                                                      | PROM2       | 6,40E-11 | 5,96                   | PLAUR domain containing 6B                              | LYPD6B      | 9,03E-07 | 3,67                   |
| transmembrane protein 156                                       | TMEM156     | 2,84E-08 | 5,82                   | forkhead box A1                                         | FOXA1       | 2,18E-09 | 3,63                   |

*Continued*

Supplementary Table S2. Continued.<sup>a</sup>

|                                                          |          |          |      |                                                                |          |          |      |
|----------------------------------------------------------|----------|----------|------|----------------------------------------------------------------|----------|----------|------|
| keratin 6A                                               | KRT6A    | 1.14E-05 | 3,61 | TIMP metalloproteinase inhibitor 3                             | TIMP3    | 4.10E-07 | 2,82 |
| kallikrein-related peptidase 5                           | KLK5     | 1.85E-05 | 3,61 | 6-phosphofructo-2-kinase/fructose-2,6-bisphosphatase 2         | PFKFB2   | 9,04E-07 | 2,81 |
| TIMP metalloproteinase inhibitor 3                       | TIMP3    | 4.94E-06 | 3,60 | ATPase, class I, type 8B, member 1                             | ATP8B1   | 1,09E-04 | 2,80 |
| lipase, family member K                                  | LIPK     | 1.92E-06 | 3,58 | PDZ and LIM domain 1                                           | PDLM1    | 3,68E-08 | 2,79 |
| laminin, alpha 3                                         | LAMA3    | 1.38E-09 | 3,56 | protein phosphatase 2 (formerly 2A), regulatory subunit        | PPP2R3A  | 1,03E-06 | 2,79 |
| Cas-Br-M ecotropic retroviral transforming sequence      | CBLC     | 1,06E-07 | 3,55 | G protein-coupled receptor 87                                  | GPR87    | 3,72E-05 | 2,78 |
| plastin 1                                                | PLS1     | 1,04E-06 | 3,54 | tripartite motif-containing 31                                 | TRIM31   | 1,06E-06 | 2,77 |
| solute carrier family 9                                  | SLC9A7   | 3,94E-06 | 3,52 | discoidin domain receptor tyrosine kinase 1                    | DDR1     | 5,23E-07 | 2,76 |
| ankyrin 3, node of Ranvier                               | ANK3     | 4,80E-06 | 3,50 | lethal giant larvae homolog 2 (Drosophila)                     | LLGL2    | 1,55E-06 | 2,76 |
| retinol binding protein 4, plasma                        | RBP4     | 8,24E-07 | 3,47 | calbindin 1, 28kDa                                             | CALB1    | 1,61E-05 | 2,75 |
| keratin 6B                                               | KRT6B    | 1,83E-06 | 3,45 | pregnancy specific beta-1-glycoprotein 4                       | PSG4     | 3,28E-05 | 2,73 |
| xylosyltransferase I                                     | XYLT1    | 1,08E-08 | 3,43 | semaphorin 7A, GPI membrane anchor                             | SEMA7A   | 3,68E-05 | 2,72 |
| egl nine homolog 3                                       | EGLN3    | 7,81E-07 | 3,40 | glutathione peroxidase 2 (gastrointestinal)                    | GPX2     | 4,44E-06 | 2,71 |
| tripartite motif-containing 29                           | TRIM29   | 5,99E-06 | 3,38 | pregnancy specific beta-1-glycoprotein 7                       | PSG7     | 6,49E-05 | 2,71 |
| complement factor H-related 1                            | CFHR1    | 5,00E-06 | 3,35 | tetraspanin 1                                                  | TSPAN1   | 3,42E-05 | 2,71 |
| chromosome 6 open reading frame 132                      | C6orf132 | 2,10E-08 | 3,35 | tripartite motif-containing 31                                 | TRIM31   | 1,43E-06 | 2,69 |
| solute carrier family 37                                 | SLC37A1  | 6,47E-07 | 3,33 | calmin (calponin-like, transmembrane)                          | CLMN     | 6,14E-09 | 2,68 |
| CMT1A duplicated region transcript 1                     | CDRT1    | 9,76E-05 | 3,32 | myosin IB                                                      | MYO1B    | 8,88E-06 | 2,68 |
| RNA binding motif protein 47                             | RBM47    | 4,40E-08 | 3,31 | angiotensin I converting enzyme (peptidyl-dipeptidase A) 2     | ACE2     | 1,03E-06 | 2,67 |
| CD24 molecule                                            | CD24     | 8,58E-06 | 3,29 | leucine zipper, down-regulated in cancer 1                     | LDOC1    | 3,59E-07 | 2,67 |
| Kallmann syndrome 1 sequence                             | KAL1     | 3,15E-05 | 3,29 | ABI family, member 3 (NESH) binding protein                    | ABI3BP   | 1,72E-05 | 2,66 |
| keratin 19                                               | KRT19    | 1,41E-05 | 3,27 | FYVE, RhoGEF and PH domain containing 3                        | FGD3     | 4,25E-07 | 2,66 |
| histone cluster 1, H1b                                   | HIST1H1B | 5,91E-05 | 3,24 | mucin 21, cell surface associated                              | MUC21    | 1,54E-04 | 2,65 |
| actin-related Arp11                                      | ARP11    | 3,50E-04 | 3,23 | ribosomal protein S6 kinase, 90kDa, polypeptide 6              | RPS6KA6  | 6,95E-07 | 2,65 |
| odd-skipped related 2                                    | OSR2     | 8,47E-06 | 3,23 | mucin 21, cell surface associated                              | MUC21    | 2,04E-04 | 2,65 |
| solute carrier family 12 (sodium/chloride transporters)  | SLC12A3  | 3,18E-05 | 3,22 | macrophage stimulating 1 receptor (c-met-related tyrosine)     | MST1R    | 6,08E-06 | 2,64 |
| transmembrane channel-like 5                             | TMC5     | 6,20E-09 | 3,21 | 3'-phosphoadenosine 5'-phosphosulfate synthase 2               | PAPSS2   | 2,80E-06 | 2,63 |
| neuregulin 4                                             | NRG4     | 4,73E-06 | 3,21 | discoidin domain receptor tyrosine kinase 1                    | DDR1     | 3,71E-07 | 2,63 |
| SH2 domain containing 3A                                 | SH2D3A   | 2,45E-07 | 3,20 | keratin 17                                                     | KRT17    | 7,12E-05 | 2,63 |
| chromatin modifying protein 4C                           | CHMP4C   | 1,24E-05 | 3,19 | acid phosphatase 6, lysophosphatidic                           | ACP6     | 1,25E-04 | 2,62 |
| StAR-related lipid transfer (START) domain               | STAR10   | 1,60E-07 | 3,19 | ring finger protein 144B                                       | RNF144B  | 1,43E-04 | 2,61 |
| keratin 18                                               | KRT18    | 6,27E-07 | 3,18 | ATPase family, AAA domain containing 4                         | ATAD4    | 5,62E-07 | 2,61 |
| chemokine (C-X-C motif) ligand 16                        | CXCL16   | 5,07E-05 | 3,14 | ankyrin repeat domain 2 (stretch responsive muscle)            | ANKRD2   | 2,06E-04 | 2,61 |
| folliculin                                               | FST      | 5,43E-06 | 3,14 | hypothetical LOC641928                                         | FLJ16734 | 1,09E-04 | 2,60 |
| mucin 1, cell surface associated                         | MUC1     | 5,71E-04 | 3,13 | protease, serine, 22                                           | PRSS2    | 5,04E-08 | 2,60 |
| family with sequence similarity 84, member B             | FAM84B   | 1,04E-04 | 3,12 | receptor-interacting serine-threonine kinase 4                 | RIPK4    | 1,56E-05 | 2,60 |
| keratin 18                                               | KRT18    | 1,45E-06 | 3,12 | rhotekin                                                       | RTKN     | 3,31E-06 | 2,59 |
| phosphoenolpyruvate carboxykinase 2                      | PCK2     | 3,30E-04 | 3,11 | discoidin domain receptor tyrosine kinase 1                    | DDR1     | 6,89E-07 | 2,59 |
| InaD-like                                                | INADL    | 8,45E-08 | 3,11 | sulfotransferase family, cytosolic, 2B, member 1               | SULT2B1  | 1,19E-07 | 2,59 |
| glycerophosphodiester                                    | GDPD3    | 5,35E-07 | 3,10 | beta-carotene oxygenase 2                                      | BCO2     | 1,24E-06 | 2,59 |
| family with sequence similarity 160, member A1           | FAM160A1 | 6,32E-07 | 3,06 | signal transducing adaptor family member 2                     | STAP2    | 7,63E-06 | 2,58 |
| mucin 21, cell surface associated                        | MUC21    | 4,08E-05 | 3,05 | sushi-repeat-containing protein, X-linked 2                    | SRPX2    | 5,50E-04 | 2,58 |
| muscleblind-like 3                                       | MBNL3    | 6,73E-07 | 3,05 | ATPase, class II, type 9A                                      | ATP9A    | 3,54E-06 | 2,56 |
| fyn-related kinase                                       | FRK      | 5,15E-05 | 3,05 | mannosyl (alpha-1,3-)glycoprotein beta-1,4-N-acetylgluco       | MGAT4A   | 1,01E-04 | 2,56 |
| myxovirus (influenza virus) resistance 1                 | MX1      | 7,85E-04 | 3,04 | transforming growth factor, alpha                              | TGFA     | 6,02E-07 | 2,56 |
| chromosome 4 open reading frame 19                       | C4orf19  | 3,20E-07 | 3,04 | nuclear receptor interacting protein 1                         | NRIP1    | 1,78E-06 | 2,56 |
| zinc finger protein 165                                  | ZNF165   | 1,86E-05 | 3,03 | periplakin                                                     | PPL      | 1,04E-06 | 2,55 |
| chemokine (C-C motif) ligand 28                          | CCL28    | 1,01E-05 | 3,01 | secretory leukocyte peptidase inhibitor                        | SLPI     | 4,77E-05 | 2,52 |
| sterile alpha motif domain containing 12                 | SAMD12   | 3,15E-07 | 3,01 | solute carrier family 44, member 3                             | SLC44A3  | 3,07E-06 | 2,52 |
| echinoderm microtubule associated protein like 5         | EML5     | 9,37E-08 | 2,99 | phospholipase A2, group XVI                                    | PLA2G16  | 4,77E-05 | 2,52 |
| keratin 8                                                | KRT8     | 2,84E-07 | 2,96 | tripartite motif-containing 31                                 | TRIM31   | 3,50E-06 | 2,52 |
| ATP-binding cassette, sub-family G (WHITE), member 2     | ABCG2    | 3,65E-05 | 2,96 | potassium voltage-gated channel, KQT-like subfamily            | KCNQ3    | 9,44E-06 | 2,51 |
| keratin 19 pseudogene 2                                  | KRT19P2  | 9,87E-08 | 2,95 | NK1 homeobox 2                                                 | NKX1-2   | 9,20E-07 | 2,51 |
| cathepsin H                                              | CTSH     | 3,49E-06 | 2,95 | inhibitor of DNA binding 3, dominant negative helix-loop-helix | ID3      | 1,78E-04 | 2,50 |
| Xg blood group                                           | XG       | 8,23E-07 | 2,92 | serine incorporator 2                                          | SERINC2  | 2,65E-05 | 2,50 |
| ovo-like 2 (Drosophila)                                  | OVOL2    | 3,43E-06 | 2,91 | transmembrane protein 141                                      | TMEM141  | 3,85E-08 | 2,50 |
| myosin ID                                                | MYO1D    | 4,85E-07 | 2,91 | transcription factor 7-like 1 (T-cell specific, HMG-box)       | TCF7L1   | 1,45E-05 | 2,50 |
| family with sequence similarity 83, member A             | FAM83A   | 1,48E-05 | 2,89 | scavenger receptor class A, member 3                           | SCARA3   | 1,37E-05 | 2,50 |
| sulfotransferase family 1E, estrogen-preferring          | SULT1E1  | 6,52E-04 | 2,89 | poly(A) binding protein interacting protein 2B                 | PAIP2B   | 2,31E-06 | 2,50 |
| protein tyrosine phosphatase, receptor type              | PTPRJ    | 1,18E-06 | 2,89 | tripartite motif-containing 16                                 | TRIM16   | 1,81E-05 | 2,50 |
| beta-site APP-cleaving enzyme 2                          | BACE2    | 1,31E-07 | 2,88 | zinc finger protein 704                                        | ZNF704   | 1,51E-08 | 2,49 |
| keratin 18                                               | KRT18    | 9,86E-09 | 2,85 | transmembrane protein 139                                      | TMEM139  | 1,55E-05 | 2,49 |
| short chain dehydrogenase/reductase family 42E, member 1 | SDR42E1  | 3,94E-07 | 2,85 | transglutaminase 1 (K polypeptide epidermal type I)            | TGM1     | 1,92E-07 | 2,48 |
| chromosome 21 open reading frame 87                      | C21orf87 | 8,20E-06 | 2,83 | DENN/MADD domain containing 2D                                 | DENND2D  | 1,05E-04 | 2,48 |
| osteomodulin                                             | OMD      | 1,08E-05 | 2,82 | mutated in colorectal cancers                                  | MCC      | 5,79E-08 | 2,47 |
| deltex homolog 4 (Drosophila)                            | DTX4     | 3,73E-08 | 2,82 | plakophilin 3                                                  | PKP3     | 3,61E-07 | 2,47 |
| allograft inflammatory factor 1-like                     | AIF1L    | 2,20E-06 | 2,82 | transmembrane channel-like 4                                   | TMC4     | 1,61E-05 | 2,47 |

Continued



FUNCTIONAL HETEROGENEITY OF CANCER STEM CELL-LIKE CELLS

Supplementary Table S2. Continued.<sup>a</sup>

|                                                            |            |          |      |                                                       |           |          |      |
|------------------------------------------------------------|------------|----------|------|-------------------------------------------------------|-----------|----------|------|
| vesicle-associated membrane protein 8 (endobrevin)         | VAMP8      | 8.39E-06 | 2.46 | SID1 transmembrane family, member 2                   | SIDT2     | 8.79E-08 | 2.18 |
| claudin 8                                                  | CLDN8      | 1.28E-05 | 2.46 | ankyrin repeat domain 30A                             | ANKRD30A  | 2.43E-05 | 2.18 |
| keratin 6C                                                 | KRT6C      | 4.97E-06 | 2.45 | desmoglein 2                                          | DSG2      | 6.04E-06 | 2.17 |
| cell adhesion molecule 1                                   | CADM1      | 5.33E-07 | 2.45 | LPS-responsive vesicle trafficking                    | LRBA      | 3.56E-07 | 2.17 |
| post-GPI attachment to proteins 2                          | PGAP2      | 1.95E-08 | 2.44 | cystatin E/M                                          | CST6      | 6.47E-06 | 2.17 |
| interleukin 17 receptor B                                  | IL17RB     | 3.43E-06 | 2.44 | discs, large homolog 3 (Drosophila)                   | DLG3      | 1.32E-05 | 2.17 |
| neurophilin 2                                              | NRP2       | 3.17E-07 | 2.43 | chromosome 3 open reading frame 57                    | C3orf57   | 9.43E-07 | 2.17 |
| S100 calcium binding protein P                             | S100P      | 4.43E-04 | 2.42 | DEP domain containing 6                               | DEPDC6    | 1.62E-05 | 2.16 |
| chromosome 17 open reading frame 28                        | C17orf28   | 2.30E-06 | 2.42 | chromosome 1 open reading frame 106                   | C1orf106  | 1.17E-06 | 2.16 |
| myelin protein zero-like 3                                 | MPZL3      | 2.73E-06 | 2.41 | solute carrier family 20 (phosphate transporter)      | SLC20A2   | 1.45E-05 | 2.16 |
| nuclear receptor subfamily 3, group C, member 2            | NR3C2      | 4.21E-06 | 2.41 | adaptor-related protein complex 1, sigma 3 subunit    | API3      | 1.32E-05 | 2.16 |
| RAB15, member RAS oncogene family                          | RAB15      | 3.40E-08 | 2.41 | family with sequence similarity 107, member B         | FAM107B   | 5.09E-05 | 2.16 |
| SH3 and multiple ankyrin repeat domains 2                  | SHANK2     | 3.29E-08 | 2.40 | matrix Gla protein                                    | MGP       | 7.95E-04 | 2.15 |
| spectrin, beta, non-erythrocytic 2                         | SPTBN2     | 3.61E-07 | 2.40 | uncoupling protein 2 (mitochondrial, proton carrier)  | UCP2      | 5.23E-05 | 2.14 |
| Rho GTPase activating protein 27                           | ARHGAP27   | 9.23E-10 | 2.39 | choline dehydrogenase                                 | CHDH      | 1.51E-04 | 2.14 |
| prostaglandin E synthase                                   | PTGES      | 7.92E-06 | 2.37 | caspace 4, apoptosis-related cysteine peptidase       | CASP4     | 1.70E-06 | 2.14 |
| Rho-type GTPase-activating protein FLJ32810                | FLJ32810   | 7.54E-07 | 2.37 | StAR-related lipid transfer (START) domain            | STARSD8   | 4.91E-05 | 2.14 |
| chromosome 8 open reading frame 31                         | C8orf31    | 3.41E-08 | 2.37 | ovo-like 1 (Drosophila)                               | OVOL1     | 7.65E-05 | 2.13 |
| coiled-coil domain containing 120                          | CCDC120    | 8.36E-06 | 2.37 | lipase, endothelial                                   | LIPG      | 7.04E-04 | 2.13 |
| synaptotagmin VIII                                         | SYT8       | 2.47E-06 | 2.37 | myosin, light chain 9, regulatory                     | MYL9      | 2.32E-04 | 2.13 |
| glutathione S-transferase mu 1                             | GSTM1      | 1.56E-06 | 2.33 | cytochrome b-561                                      | CYB561    | 9.99E-07 | 2.13 |
| erythrocyte membrane protein band 4.1-like 1               | EPB41L1    | 6.99E-07 | 2.32 | heparan sulfate 6-O-sulfotransferase 2                | HS6ST2    | 1.68E-05 | 2.13 |
| solute carrier family 37 (glycerol-3-phosphate transport)  | SLC37A2    | 2.99E-04 | 2.32 | chloride intracellular channel 3                      | CLIC3     | 1.28E-04 | 2.13 |
| ST6 (alpha-N-acetyl-neuraminy-2,3-beta-galactosyl-5)       | ST6GALNAC5 | 1.35E-05 | 2.31 | signal-induced proliferation-associated 1 like 1      | SIPA1L1   | 1.13E-05 | 2.12 |
| NEL-like 2 (chicken)                                       | NELL2      | 8.00E-04 | 2.31 | disvelled associated activator of morphogenesis 1     | DAAM1     | 4.61E-06 | 2.12 |
| kallikrein-related peptidase 8                             | KLK8       | 4.03E-05 | 2.30 | phosphoinositide-3-kinase, class 2, beta polypeptide  | PIK3C2B   | 1.46E-05 | 2.12 |
| phospholipase A2, group X                                  | PLA2G10    | 1.82E-05 | 2.29 | Sp6 transcription factor                              | SP6       | 1.52E-04 | 2.11 |
| basic helix-loop-helix family, member e41                  | BHLHE41    | 4.00E-06 | 2.29 | solute carrier family 9 (sodium/hydrogen exchanger)   | SLC9A2    | 6.21E-05 | 2.11 |
| glypican 4                                                 | GPC4       | 6.15E-06 | 2.29 | KIAA1244                                              | KIAA1244  | 1.59E-04 | 2.11 |
| ventricular zone expressed PH domain homolog 1 (zebrafish) | VEPH1      | 3.76E-06 | 2.28 | synaptotagmin-like 2                                  | SYTL2     | 1.07E-04 | 2.11 |
| multiple EGF-like-domains 9                                | MEGF9      | 5.90E-06 | 2.28 | slingshot homolog 3 (Drosophila)                      | SSH3      | 3.06E-06 | 2.10 |
| CMT1A duplicated region transcript 1                       | CDRT1      | 2.25E-04 | 2.28 | biliverdin reductase B (flavin reductase (NADPH))     | BLVRB     | 7.63E-06 | 2.10 |
| family with sequence similarity 169, member A              | FAM169A    | 4.63E-06 | 2.28 | NLR family, pyrin domain containing 2                 | NLRP2     | 6.67E-08 | 2.10 |
| solute carrier family 2 (facilitated glucose transporter)  | SLC2A12    | 1.06E-08 | 2.27 | KIAA0040                                              | KIAA0040  | 7.19E-04 | 2.10 |
| KIAA1161                                                   | KIAA1161   | 9.19E-06 | 2.27 | proprotein convertase subtilisin/kexin type 6         | PCSK6     | 2.77E-08 | 2.10 |
| peptidyl arginine deiminase, type I                        | PADI1      | 8.26E-07 | 2.27 | TBC1 domain family, member 30                         | TBC1D30   | 1.20E-06 | 2.09 |
| mal, T-cell differentiation protein-like                   | MALL       | 1.41E-04 | 2.27 | solute carrier family 29 (nucleoside transporters)    | SLC29A3   | 9.32E-06 | 2.09 |
| endothelin receptor type B                                 | EDNRB      | 9.26E-05 | 2.27 | aldehyde dehydrogenase 3 family, member B2            | ALDH3B2   | 1.10E-06 | 2.08 |
| interleukin 1 receptor accessory protein                   | IL1RAP     | 4.56E-05 | 2.26 | Rho GTPase activating protein 20                      | ARHGAP20  | 2.72E-05 | 2.08 |
| adaptor-related protein complex 1, gamma 2 subunit         | AP1G2      | 2.04E-06 | 2.26 | nuclear receptor coactivator 7                        | NCOA7     | 1.50E-04 | 2.07 |
| mitochondrial tumor suppressor 1                           | MTUS1      | 1.89E-05 | 2.26 | aldehyde dehydrogenase 1 family, member L1            | ALDH1L1   | 4.56E-06 | 2.07 |
| HLA complex group 4                                        | HCG4       | 4.66E-06 | 2.26 | keratin 16                                            | KRT16     | 5.82E-06 | 2.06 |
| galactosidase, beta 1-like 2                               | GLB1L2     | 2.10E-05 | 2.25 | tumor necrosis factor, alpha-induced protein 2        | TNFAIP2   | 5.81E-06 | 2.06 |
| tumor protein p53 inducible protein 3                      | TP53I3     | 1.77E-06 | 2.25 | solute carrier family 1                               | SLC1A3    | 9.60E-04 | 2.06 |
| solute carrier family 16, member 13                        | SLC16A13   | 1.13E-04 | 2.25 | low density lipoprotein receptor-related protein 10   | LRP10     | 9.40E-05 | 2.05 |
| RNA binding protein with multiple splicing                 | RBPMS      | 6.25E-05 | 2.24 | bone morphogenetic protein receptor, type IB          | BMPRI1B   | 1.24E-05 | 2.05 |
| CDC42 small effector 2                                     | CDC42SE2   | 2.02E-06 | 2.23 | microtubule associated serine/threonine kinase family | MAST4     | 1.01E-04 | 2.05 |
| phospholipase A2, group VII (platelet-activating factor)   | PLA2G7     | 1.27E-04 | 2.23 | phosphodiesterase 3A, cGMP-inhibited                  | PDE3A     | 1.68E-06 | 2.05 |
| tumor protein p53 inducible protein 11                     | TP53I11    | 2.43E-07 | 2.23 | 2',5'-oligoadenylate synthetase 1, 40/46kDa           | OAS1      | 1.25E-03 | 2.05 |
| protein kinase, AMP-activated, alpha 2 catalytic subunit   | PRKAA2     | 2.51E-06 | 2.23 | epoxide hydrolase 1, microsomal (xenobiotic)          | EPHX1     | 1.88E-05 | 2.05 |
| alkaline phosphatase, placental-like 2                     | ALPLP2     | 2.12E-04 | 2.22 | lymphocyte antigen 6 complex, locus E                 | LY6E      | 4.53E-04 | 2.04 |
| EF-hand domain family, member D1                           | EFHD1      | 6.78E-07 | 2.22 | histone cluster 1, H2bm                               | HIST1H2BM | 4.16E-04 | 2.04 |
| pregnancy specific beta-1-glycoprotein 5                   | PSG5       | 4.80E-05 | 2.22 | CKLF-like MARVEL transmembrane domain containing 4    | CMTM4     | 6.66E-06 | 2.04 |
| CSRP2 binding protein                                      | CSRP2BP    | 5.30E-06 | 2.22 | Rho GTPase-activating protein                         | RICS      | 1.24E-05 | 2.04 |
| sodium channel, nonvoltage-gated 1, gamma                  | SCNN1G     | 3.77E-04 | 2.21 | neogenin homolog 1 (chicken)                          | NEO1      | 1.29E-05 | 2.04 |
| matrix metalloproteinase 15 (membrane-inserted)            | MMP15      | 2.32E-06 | 2.21 | protein kinase C, zeta                                | PRKCZ     | 2.77E-06 | 2.03 |
| claudin 4                                                  | CLDN4      | 2.09E-07 | 2.21 | frizzled homolog 3 (Drosophila)                       | FZD3      | 1.07E-05 | 2.03 |
| chromosome 1 open reading frame 210                        | C1orf210   | 9.06E-07 | 2.21 | complement component 3                                | C3        | 1.11E-03 | 2.03 |
| ubiquitin associated and SH3 domain containing, B          | UBASH3B    | 5.47E-05 | 2.20 | T-cell lymphoma invasion and metastasis 1             | TIAM1     | 1.16E-07 | 2.03 |
| interleukin 6 receptor                                     | IL6R       | 3.31E-07 | 2.20 | protein phosphatase 1H (PP2C domain containing)       | PPM1H     | 3.14E-05 | 2.03 |
| junctophilin 1                                             | JPH1       | 6.18E-05 | 2.20 | chromosome 1 open reading frame 172                   | C1orf172  | 1.72E-06 | 2.02 |
| EPH receptor A1                                            | EPHA1      | 5.10E-06 | 2.20 | keratin 80                                            | KRT80     | 2.79E-06 | 2.02 |
| phosphoglucosyltransferase 2-like 1                        | PGM2L1     | 2.71E-04 | 2.20 | pregnancy specific beta-1-glycoprotein 8              | PSG8      | 5.73E-05 | 2.01 |
| chromosome 7 open reading frame 68                         | C7orf68    | 1.47E-07 | 2.20 | epsin 3                                               | EPN3      | 4.59E-06 | 2.01 |
| protein phosphatase 1, regulatory (inhibitor) subunit 1    | PPP1R13B   | 1.55E-06 | 2.19 | UDP-N-acetyl-alpha-D-galactosamine                    | GALNT6    | 1.85E-05 | 2.01 |
| acyl-CoA synthetase long-chain family member 5             | ACSL5      | 2.15E-06 | 2.19 | plexin A2                                             | PLXNA2    | 6.30E-05 | 2.01 |
| transforming, acidic coiled-coil containing protein 2      | TACC2      | 9.58E-07 | 2.19 | tripartite motif-containing 16-like                   | TRIM16L   | 1.05E-05 | 2.00 |
| insulin-like growth factor binding protein 3               | IGFBP3     | 2.13E-05 | 2.19 | distal-less homeobox 3                                | DLX3      | 1.90E-04 | 2.00 |

Continued

Supplementary Table S2. *Continued*<sup>b</sup>

|                                                         |           |          |       |                                                         |          |          |       |
|---------------------------------------------------------|-----------|----------|-------|---------------------------------------------------------|----------|----------|-------|
| dual-specificity tyrosine-(Y)-phosphorylation regulated | DYRK3     | 1,54E-06 | -2,00 | serpin peptidase inhibitor, clade B (ovalbumin)         | SERPINB7 | 9,88E-05 | -2,23 |
| SH3-domain kinase binding protein 1                     | SH3KBP1   | 2,74E-04 | -2,00 | fibrillin 1                                             | FBN1     | 1,14E-03 | -2,23 |
| amylase, alpha 2B (pancreatic)                          | AMY2B     | 5,20E-05 | -2,00 | transcobalamin II; macrocytic anemia                    | TCN2     | 1,46E-05 | -2,24 |
| CD68 molecule                                           | CD68      | 4,06E-04 | -2,01 | thyroid hormone receptor, alpha                         | THRA     | 1,87E-05 | -2,27 |
| guanine nucleotide binding protein (G protein), gamma 4 | GNG4      | 7,97E-04 | -2,01 | F-box protein 43                                        | FBXO43   | 3,56E-05 | -2,28 |
| PR domain containing 8                                  | PRDM8     | 1,04E-03 | -2,01 | poly (ADP-ribose) polymerase family, member 8           | PARP8    | 1,49E-05 | -2,28 |
| chloride intracellular channel 2                        | CLIC2     | 4,97E-04 | -2,02 | solute carrier family 20 (phosphate transporter)        | SLC20A1  | 2,10E-06 | -2,28 |
| Cbp/p300-interacting transactivator                     | CITED2    | 1,34E-05 | -2,02 | phosphoglucosyltransferase 3                            | PGM3     | 5,61E-06 | -2,31 |
| neutral cholesterol ester hydrolase 1                   | NCEH1     | 8,37E-08 | -2,02 | zinc finger protein 117                                 | ZNF117   | 3,20E-06 | -2,31 |
| melanoma antigen family D, 2                            | MAGED2    | 3,42E-04 | -2,02 | tyrosylprotein sulfotransferase 1                       | TPST1    | 1,09E-05 | -2,31 |
| sorbin and SH3 domain containing 2                      | SORBS2    | 1,13E-03 | -2,03 | gamma-glutamyl hydrolase                                | GGH      | 5,40E-06 | -2,31 |
| leucine proline-enriched proteoglycan (leprecan) 1      | LEPRE1    | 6,97E-07 | -2,03 | JAZF zinc finger 1                                      | JAZF1    | 8,70E-07 | -2,31 |
| sprouty homolog 2 (Drosophila)                          | SPRY2     | 3,83E-06 | -2,03 | tetraspanin 5                                           | TSPAN5   | 6,56E-07 | -2,31 |
| retinoic acid early transcript 1E                       | RAET1E    | 3,11E-04 | -2,04 | plasminogen activator, tissue                           | PLAT     | 1,28E-05 | -2,31 |
| excision repair cross-complementing rodent repair       | ERCC1     | 2,44E-06 | -2,04 | caprin family member 2                                  | CAPRN2   | 2,18E-05 | -2,34 |
| nephroblastoma overexpressed gene                       | NOV       | 1,64E-04 | -2,05 | neuron navigator 1                                      | NAV1     | 2,94E-05 | -2,34 |
| deleted in malignant brain tumors 1 pseudogene          | FLJ46361  | 1,25E-04 | -2,05 | spermidine/spermine N1-acetyltransferase 1              | SAT1     | 1,30E-04 | -2,35 |
| family with sequence similarity 70, member B            | FAM70B    | 1,72E-05 | -2,05 | cathepsin L1                                            | CTSL1    | 8,80E-07 | -2,41 |
| sema domain, transmembrane domain                       | SEMA6D    | 6,55E-04 | -2,06 | interferon, gamma-inducible protein 16                  | IFI16    | 3,97E-05 | -2,41 |
| collagen, type VI, alpha 1                              | COL6A1    | 1,65E-04 | -2,06 | deleted in malignant brain tumors 1                     | DMBT1    | 4,30E-09 | -2,41 |
| phosphoprotein associated with glycosphingolipid        | PAG1      | 9,67E-06 | -2,06 | fibulin 2                                               | FBLN2    | 1,18E-05 | -2,43 |
| colony stimulating factor 1 (macrophage)                | CSF1      | 1,45E-05 | -2,06 | eukaryotic translation initiation factor 5A2            | EIF5A2   | 9,57E-07 | -2,43 |
| ADP-ribosylation factor-like 4D                         | ARL4D     | 1,13E-05 | -2,07 | growth arrest-specific 6                                | GAS6     | 8,67E-06 | -2,43 |
| coiled-coil domain containing 46                        | CCDC46    | 4,00E-06 | -2,07 | apolipoprotein B mRNA editing enzyme                    | APOBEC3B | 1,16E-04 | -2,44 |
| zinc finger protein 876 (pseudogene)                    | ZNF876P   | 1,94E-05 | -2,07 | serpin peptidase inhibitor, clade B (ovalbumin)         | SERPINB8 | 1,90E-05 | -2,44 |
| armadillo repeat containing, X-linked 1                 | ARMCX1    | 4,19E-08 | -2,07 | acyl-CoA synthetase long-chain family member 4          | ACSL4    | 2,48E-07 | -2,45 |
| v-abl Abelson murine leukemia viral oncogene homolog 2  | ABL2      | 1,15E-05 | -2,07 | absent in melanoma 2                                    | AIM2     | 1,94E-05 | -2,45 |
| protein kinase C, alpha                                 | PRKCA     | 1,35E-04 | -2,07 | SWI/SNF related, matrix associated, actin dependent     | SMARCA1  | 4,45E-04 | -2,46 |
| G protein-coupled receptor 39                           | GPR39     | 9,99E-06 | -2,07 | decorin                                                 | DCN      | 4,39E-05 | -2,47 |
| Lix1 homolog (mouse)-like                               | LIX1L     | 1,03E-08 | -2,07 | PTPRF interacting protein, binding protein 1            | PPFIBP1  | 4,67E-05 | -2,47 |
| metallothionein 1E                                      | MT1E      | 1,21E-04 | -2,08 | paraoxonase 2                                           | PON2     | 1,05E-07 | -2,52 |
| lymphocyte-specific protein 1                           | LSP1      | 2,77E-06 | -2,09 | endogenous retroviral sequence 3                        | ERV3     | 5,32E-05 | -2,53 |
| perilipin 2                                             | PLIN2     | 3,07E-04 | -2,09 | fibroblast growth factor receptor 1                     | FGFR1    | 1,59E-06 | -2,54 |
| solute carrier family 39 (zinc transporter)             | SLC39A10  | 4,99E-05 | -2,10 | family with sequence similarity 114, member A1          | FAM114A1 | 8,35E-05 | -2,54 |
| sprouty homolog 4 (Drosophila)                          | SPRY4     | 8,06E-05 | -2,10 | chromosome 5 open reading frame 41                      | C5orf41  | 1,34E-05 | -2,54 |
| transmembrane protein 154                               | TMEM154   | 1,11E-03 | -2,10 | synapse defective 1, Rho GTPase, homolog 1 (C. elegans) | SYDE1    | 6,26E-08 | -2,55 |
| RNA, U5F small nuclear                                  | RNU5F     | 1,51E-04 | -2,10 | S100 calcium binding protein A3                         | S100A3   | 9,60E-05 | -2,55 |
| RAB7, member RAS oncogene family-like 1                 | RAB7L1    | 1,74E-06 | -2,10 | Kruppel-like factor 12                                  | KLF12    | 1,00E-05 | -2,56 |
| oxysterol binding protein 2                             | OSBP2     | 8,03E-07 | -2,11 | glutaredoxin (thioltransferase)                         | GLRX     | 4,07E-05 | -2,56 |
| transforming growth factor, beta receptor III           | TGFBR3    | 2,83E-04 | -2,11 | milk fat globule-EGF factor 8 protein                   | MFGE8    | 4,74E-07 | -2,58 |
| formin-like 1                                           | FMNL1     | 4,33E-06 | -2,11 | solute carrier family 5 (sodium/glucose cotransporter)  | SLC5A12  | 5,09E-04 | -2,59 |
| aldehyde oxidase 1                                      | AOX1      | 1,11E-09 | -2,12 | ankyrin repeat and sterile alpha motif domain           | ANKS1B   | 2,35E-04 | -2,61 |
| CD55 molecule, decay accelerating factor for complement | CD55      | 4,03E-04 | -2,12 | TBC1 domain family, member 4                            | TBC1D4   | 5,93E-07 | -2,62 |
| Rho GTPase activating protein 18                        | ARHGAP18  | 1,23E-06 | -2,14 | RAB31, member RAS oncogene family                       | RAB31    | 4,33E-05 | -2,64 |
| dystonin                                                | DST       | 4,98E-06 | -2,14 | StAR-related lipid transfer (START) domain containing 4 | STAR4    | 5,87E-07 | -2,68 |
| p21 protein (Cdc42/Rac)-activated kinase 1              | PAK1      | 1,06E-04 | -2,15 | solute carrier organic anion transporter family         | SLCO4A1  | 3,55E-05 | -2,69 |
| disabled homolog 2, mitogen-responsive phosphoprotein   | DAB2      | 3,28E-06 | -2,15 | tumor necrosis factor, alpha-induced protein 6          | TNFAIP6  | 6,25E-04 | -2,70 |
| chromosome 12 open reading frame 35                     | C12orf35  | 4,79E-05 | -2,16 | L1 cell adhesion molecule                               | L1CAM    | 9,63E-05 | -2,72 |
| tropomodulin 2 (neuronal)                               | TMOD2     | 1,43E-04 | -2,17 | DENN/MADD domain containing 5B                          | DENND5B  | 1,20E-08 | -2,74 |
| Ras-related GTP binding D                               | RRAGD     | 2,37E-06 | -2,17 | zinc finger protein 804A                                | ZNF804A  | 2,91E-04 | -2,76 |
| retinoid X receptor, gamma                              | RXRG      | 3,02E-05 | -2,17 | spastic ataxia of Charlevoix-Saguenay (sacsin)          | SACS     | 2,25E-06 | -2,78 |
| ATP-binding cassette, sub-family A (ABC1), member 8     | ABCA8     | 8,73E-05 | -2,17 | Htra serine peptidase 1                                 | HTRA1    | 1,08E-07 | -2,79 |
| metallothionein 1X                                      | MT1X      | 7,32E-04 | -2,17 | programmed cell death 1 ligand 2                        | PDCD1LG2 | 8,10E-06 | -2,84 |
| AHNAK nucleoprotein 2                                   | AHNAK2    | 7,68E-05 | -2,18 | IKK interacting protein                                 | IKIP     | 1,31E-05 | -2,87 |
| kelch-like 24 (Drosophila)                              | KLHL24    | 2,75E-04 | -2,18 | ST3 beta-galactoside alpha-2,3-sialyltransferase 5      | ST3GAL5  | 1,92E-06 | -2,87 |
| tumor necrosis factor, alpha-induced protein 3          | TNFAIP3   | 3,03E-04 | -2,19 | neutrophil cytosolic factor 2                           | NCF2     | 3,32E-04 | -2,88 |
| STE20-related kinase adaptor beta                       | STRADB    | 1,07E-06 | -2,19 | monoamine oxidase B                                     | MAOB     | 9,48E-05 | -2,88 |
| STE20-related kinase adaptor beta                       | STRADB    | 3,14E-07 | -2,21 | erythrocyte membrane protein band 4.1-like 2            | EPB41L2  | 5,20E-07 | -2,90 |
| centrosomal protein 170kDa                              | CEP170    | 2,60E-06 | -2,21 | fibrillin 2                                             | FBN2     | 3,77E-05 | -2,92 |
| leukocyte-associated immunoglobulin-like receptor 1     | LAIR1     | 2,36E-05 | -2,21 | CD82 molecule                                           | CD82     | 6,80E-06 | -2,92 |
| zinc finger protein 382                                 | ZNF382    | 1,11E-03 | -2,22 | acyl-CoA synthetase short-chain family member 3         | ACSS3    | 2,36E-05 | -2,94 |
| chromosome 1 open reading frame 21                      | C1orf21   | 6,23E-04 | -2,22 | tumor suppressor candidate 3                            | TUSC3    | 8,35E-05 | -2,97 |
| carboxypeptidase M                                      | CPM       | 2,20E-05 | -2,22 | opioid growth factor receptor-like 1                    | OGFRL1   | 4,64E-07 | -2,98 |
| methionine sulfoxide reductase B3                       | MSRB3     | 1,96E-07 | -2,22 | major facilitator superfamily domain containing 2       | MFS2D2   | 1,85E-08 | -3,04 |
| formyl peptide receptor 1                               | FPR1      | 4,67E-05 | -2,23 | transforming growth factor, beta 1                      | TGFB1    | 9,55E-07 | -3,10 |
| chromosome 14 open reading frame 139                    | C14orf139 | 8,06E-07 | -2,23 | DnaJ (Hsp40) homolog, subfamily B, member 4             | DNAJB4   | 4,04E-06 | -3,12 |
| nexilin (F actin binding protein)                       | NEXN      | 7,17E-04 | -2,23 | proline rich 16                                         | PRR16    | 1,61E-04 | -3,16 |

Continued

Supplementary Table S2. *Continued.*<sup>b</sup>

|                                                           |          |          |       |                                                            |           |          |        |
|-----------------------------------------------------------|----------|----------|-------|------------------------------------------------------------|-----------|----------|--------|
| guanine nucleotide binding protein (G protein), alpha 15  | GNA15    | 2,04E-05 | -3,16 | lysosomal protein transmembrane 5                          | LAPTM5    | 1,29E-04 | -4,55  |
| KDEL (Lys-Asp-Glu-Leu) endoplasmic reticulum protein      | KDELRL3  | 2,37E-05 | -3,18 | ATP-binding cassette, sub-family C (CFTR/MRP)              | ABCC4     | 6,04E-07 | -4,62  |
| peripheral myelin protein 22                              | PMP22    | 3,94E-06 | -3,20 | ATP-binding cassette, sub-family A (ABC1), member 6        | ABCA6     | 4,25E-05 | -4,64  |
| 5'-nucleotidase, ecto (CD73)                              | NT5E     | 4,40E-08 | -3,20 | lysyl oxidase                                              | LOX       | 1,23E-03 | -4,66  |
| ATP-binding cassette, sub-family A (ABC1), member 1       | ABCA1    | 3,94E-06 | -3,24 | zinc finger E-box binding homeobox 2                       | ZEB2      | 4,03E-09 | -4,72  |
| serpin peptidase inhibitor, clade E                       | SERPINE1 | 3,67E-04 | -3,27 | neuron navigator 3                                         | NAV3      | 7,90E-06 | -4,79  |
| dedicator of cytokinesis 10                               | DOCK10   | 1,10E-03 | -3,27 | vimentin                                                   | VIM       | 2,81E-06 | -4,99  |
| CD302 molecule                                            | CD302    | 1,80E-05 | -3,28 | progesterin and adipoQ receptor family member V            | PAQR5     | 4,22E-08 | -5,00  |
| potassium large conductance calcium-activated channel     | KCNMA1   | 6,68E-06 | -3,37 | pleiomorphic adenoma gene-like 1                           | PLAGL1    | 1,73E-07 | -5,08  |
| ADAM metallopeptidase with thrombospondin type 1 motif    | ADAMTS6  | 5,14E-06 | -3,41 | microtubule-associated protein 1B                          | MAP1B     | 6,30E-07 | -5,18  |
| dedicator of cytokinesis 4                                | DOCK4    | 2,73E-05 | -3,44 | N-myc downstream regulated 1                               | NDRG1     | 1,79E-06 | -5,23  |
| solute carrier family 7 (cationic amino acid transporter) | SLC7A2   | 1,62E-05 | -3,48 | anthrax toxin receptor 2                                   | ANTXR2    | 7,51E-07 | -5,37  |
| phosphodiesterase 8B                                      | PDE8B    | 1,06E-04 | -3,51 | family with sequence similarity 24, member B               | FAM24B    | 1,02E-07 | -5,52  |
| deiodinase, iodothyronine, type II                        | DIO2     | 3,65E-04 | -3,51 | plasma glutamate carboxypeptidase                          | PGCP      | 1,76E-05 | -5,53  |
| aminoadipate-semialdehyde synthase                        | AASS     | 5,59E-08 | -3,53 | annexin A6                                                 | ANXA6     | 1,15E-08 | -5,71  |
| low density lipoprotein-related protein 12                | LRP12    | 1,90E-05 | -3,53 | glutamine-fructose-6-phosphate transaminase 2              | GFPT2     | 4,03E-05 | -6,01  |
| ring finger protein 182                                   | RNF182   | 2,49E-06 | -3,56 | apolipoprotein B mRNA editing enzyme                       | APOBEC3C  | 2,59E-04 | -6,07  |
| dedicator of cytokinesis 11                               | DOCK11   | 7,48E-06 | -3,56 | hypothetical LOC151760                                     | LOC151760 | 1,13E-04 | -6,33  |
| ATPase, Ca++ transporting, plasma membrane 4              | ATP2B4   | 4,25E-07 | -3,58 | toll-like receptor 4                                       | TLR4      | 3,70E-08 | -6,79  |
| prolactin receptor                                        | PRLR     | 1,21E-06 | -3,62 | insulin-like growth factor binding protein 4               | IGFBP4    | 4,19E-07 | -7,41  |
| tetratricopeptide repeat domain 28                        | TTC28    | 2,15E-07 | -3,62 | roundabout, axon guidance receptor, homolog 1              | ROBO1     | 2,70E-07 | -7,55  |
| HEG homolog 1 (zebrafish)                                 | HEG1     | 3,01E-10 | -3,65 | slit homolog 2 (Drosophila)                                | SLIT2     | 5,98E-08 | -8,58  |
| peptidase M20 domain containing 2                         | PM20D2   | 7,56E-07 | -3,69 | guanine nucleotide binding protein (G protein), gamma 11   | GNG11     | 1,07E-04 | -8,64  |
| pop-eye domain containing 3                               | POPDC3   | 9,45E-08 | -3,79 | matrix metallopeptidase 2 (gelatinase A, 72kDa gelatinase) | MMP2      | 4,37E-04 | -8,95  |
| ecotropic viral integration site 2B                       | EVI2B    | 1,77E-07 | -3,88 | syndecan 2                                                 | SDC2      | 1,73E-06 | -10,10 |
| mastermind-like domain containing 1                       | MAMLD1   | 2,35E-07 | -3,99 | serpin peptidase inhibitor, clade E                        | SERPINE2  | 2,07E-06 | -11,22 |
| stanniocalcin 1                                           | STC1     | 3,38E-06 | -4,02 | zinc finger E-box binding homeobox 1                       | ZEB1      | 1,09E-09 | -11,30 |
| solute carrier family 16, member 2                        | SLC16A2  | 2,64E-05 | -4,21 | serglycin                                                  | SRGN      | 6,89E-07 | -11,47 |
| adenylate kinase 5                                        | AK5      | 4,90E-07 | -4,25 | eyes absent homolog 4 (Drosophila)                         | EYA4      | 1,92E-09 | -11,77 |
| epithelial membrane protein 3                             | EMP3     | 7,08E-07 | -4,32 | sparc/osteonectin, cwcv and kazal-like domains             | SPOCK1    | 5,07E-06 | -15,48 |
| interleukin 7 receptor                                    | IL7R     | 1,61E-07 | -4,41 | poliovirus receptor-related 3                              | PVRL3     | 3,51E-07 | -16,21 |
| leukemia inhibitory factor receptor alpha                 | LIFR     | 2,80E-09 | -4,48 | cadherin 2, type 1, N-cadherin (neuronal)                  | CDH2      | 5,04E-07 | -17,65 |
| MAM domain containing 2                                   | MAMDC2   | 7,55E-07 | -4,53 | collagen, type VI, alpha 3                                 | COL6A3    | 3,81E-06 | -18,44 |
| cyclin-dependent kinase 6                                 | CDK6     | 9,84E-07 | -4,54 | carbonic anhydrase VIII                                    | CA8       | 1,69E-05 | -19,57 |

<sup>a</sup>Pages S4–S6 show upregulation in A4 relative to G4.

<sup>b</sup>Pages S7–S8 show downregulation in A4 relative to G4.
